# Supplementary material
Source: publisher figshare collection journal article supplement (https://sage.figshare.com/ndownloader/files/14182802)
Supplement: Supplementary file 1 [file 14182802]

### Supplementary Material

**Table S1**

*Core Reading Program Components by Grade Level*

| Grade | Oral Language | Phonological Awareness | High Frequency Words | Phonics | Structural Analysis | Spelling | Fluency | Listening Comprehension | Background Knowledge | Vocabulary | Reading Comprehension | Close Reading | Reading-Writing Connections | Writing Process | Grammar |
|-------|---------------|------------------------|----------------------|---------|---------------------|----------|---------|-------------------------|----------------------|------------|-----------------------|---------------|-----------------------------|-----------------|---------|
| K     | X             | X                      | X                    | X       |                     |          |         | X                       | X                    | X          |                       |               | X                           | X               | X       |
| 1     | X             | X                      | X                    | X       | X                   | X        | X       | X                       | X                    | X          | X                     | X             | X                           | X               | X       |
| 2     | X             | X                      | X                    | X       | X                   | X        | X       | X                       | X                    | X          | X                     | X             | X                           | X               | X       |
| 3     |               |                        |                      | X       |                     | X        | X       | X                       | X                    | X          | X                     | X             | X                           | X               | X       |
| 4     |               |                        |                      | X       |                     | X        | X       | X                       | X                    | X          | X                     | X             |                             | X               | X       |

*Note.* K = Kindergarten

### **Fidelity Procedures**

The district intended for *Wonders* and *WonderWorks* to be implemented as prescribed by the developers, so the checklists included the specific materials and procedures for each lesson component identified. The pullout intervention did not have prescribed materials, so the checklists addressed the lesson components (e.g., interactive writing, guided reading). For both the core instruction and intervention, the focus of the fidelity evaluation was on whether or not the content and procedures were implemented (i.e., yes or no) rather than estimations of the quality with which teachers delivered those lessons. The curricular programs did not define quality of implementation—only content and procedures.

The last author trained a team of seven coders on the coding process. All coders were female, certified educators with prior classroom experience ( $M = 11$  years, range of 5-26 years), and no connections to or knowledge of the teachers or interventionists being monitored. Six coders held graduate degrees. The research team assigned each of five coders to a single grade level, based on their teaching experience implemented. Researchers assigned a sixth coder to the pullout intervention because she was trained on the framework. The seventh coder and the last author conducted reliability checks across grade levels to ensure there was no difference in the stringency of individual coders.

The initial 4-hr training addressed the coding procedures and operationalized definitions in the codebook. Coders received copies of the curricular materials relevant to their assigned files, and they participated in practice sessions with example audio files until they achieved 100% reliability. Once they started working, coders met weekly to resolve issues identified in the recordings, iteratively add detail to the codebook definitions, and prevent observer drift by checking how each was marking particularly instances of instructional fidelity. For example, the reliability coders might play a segment of audio and ask the coders to independently complete a

fidelity checklist. The reliability coders then checked the scores. In addition, approximately 23% of all audio recordings were coded by two independent coders. Across the weekly calibration meetings and the ongoing reliability checks, interrater agreement was consistently 100%.

For each teacher, the coders scored one randomly selected audio recording from the first half of the summer program and one from the last half. While listening to the recordings, the coders followed along with the teacher's manual or other lesson materials. Scoring was dichotomous (i.e., each criterion was met or not), and we calculated overall teacher fidelity as the percentage of criteria met. It is important to note that scoring was stringent, so fidelity was more difficult to achieve with the highly specified core curriculum (i.e., *Wonders* and *WonderWorks*) than the more flexible instructional framework used in the pullout intervention. For example, a *Wonders* phonological awareness activity might have four steps, so skipping just one step would result in scoring the lesson as lacking fidelity. On the other hand, if an interventionist did a writing mini-lesson, only a glaring inaccuracy (e.g., inappropriately using the word *where* for *were*) would result in scoring the lesson as lacking fidelity.

**Table S2***RAPID Reading Subtests Administered in Each Grade*

| Subtest                | Task Description                                                              | Kindergarten | Grade<br>1 | Grade<br>2 | Grades<br>3-5 |
|------------------------|-------------------------------------------------------------------------------|--------------|------------|------------|---------------|
| Phonological Awareness | Blend heard sounds to say each word                                           | X            |            |            |               |
| Word Reading           | Read aloud words displayed on the screen                                      | X            | X          | X          |               |
| Spelling               | Spell by typing each word heard                                               |              |            | X          |               |
| Word Recognition       | Select from 3 options each word heard                                         |              |            |            | X             |
| Vocabulary Pairs       | Select 2 of 3 pictures (and corresponding heard words) with similar meanings  | X            | X          | X          |               |
| Following Directions   | Select or move pictures on screen, following heard directions                 |              | X          | X          |               |
| Vocabulary Knowledge   | Select from 3 options the word that completes each sentence                   |              |            |            | X             |
| Syntactic Knowledge    | Select from 3 options the sentence or phrase that best completes a short text |              |            |            | X             |
| Reading Comprehension  | Read short passages and answer questions                                      |              |            |            | X             |

### Additional Information on Data Analytic Procedures

#### Equation for the Pre-post Change Scores Model

The unconditional growth model includes the predictor that represents time in the level-1 model; the level-2 and level-3 specifications allow for baseline and trajectory lines to vary (Hox, 2010; Raudenbush & Bryk, 2002; Singer & Willett, 2003). Thus, this model can be expressed as:

Level-1

$$Y_{ijk} = \pi_{0jk} + \pi_{1jk}(TIME_{ijk} - 1) + \varepsilon_{ijk},$$

Level-2

$$\pi_{0jk} = \gamma_{00k} + \xi_{0jk},$$

$$\pi_{1jk} = \gamma_{10k} + \xi_{1jk},$$

Level-3

$$\gamma_{00k} = \lambda_{000} + u_{00k},$$

$$\gamma_{10k} = \lambda_{100} + u_{10k},$$

where  $Y_{ijk}$  is the outcome score for the  $i$ th time point for the  $j$ th individual in teacher  $k$ ,  $\lambda_{000}$  is the baseline, and  $\lambda_{100}$  is the change trajectory. This specification of the model accounts for five residual variances. Specifically, it allows individuals to differ in baseline scores and change score trajectories, and it allows the average baseline and average change trajectory to differ by teacher. Effect sizes for this model were computed as mean change differences (Becker, 1988), where the pooled standard deviations were corrected to take into account the cluster effect via the ICCs for each model.

**Equation for the Partially Clustered Model**

Level-1

$$Y_{ij} = \beta_{0j} + \beta_{1j}(Treat_{ij}) + \varepsilon_{ij},$$

Level-2

$$\beta_{0j} = \gamma_{00} + u_{0j},$$

$$\beta_{1j} = \gamma_{10},$$

where  $Y_{ij}$  is the score of the outcome  $Y$  for the  $i$ th observation in the  $j$ th cluster. In this specification of the model, the treatment group has several clusters while the control group can be represented as a single group,  $\beta_{0j}$  is the intercept,  $\beta_{1j}$  is the mean difference between the treatment and the control group, and  $Treat_{ij}$  is a dummy variable that is coded as one if the unit belongs to the treatment group and zero otherwise. The control group contains a single source of error at level 1, but the treatment group also accounts for a level-2 error (i.e., between-groups variability). Recall that the estimation of this model includes weights-based propensity scores.

**RAPID Descriptive Statistics by Grade Level****Tables S3 (Kindergarten)***Correlations for Kindergarten Scores*

|          |       | Pretest |       |      |      | Posttest |       |      |      |
|----------|-------|---------|-------|------|------|----------|-------|------|------|
|          |       | RSP     | WRead | VP   | PA   | RSP      | WRead | VP   | PA   |
| Pretest  | RSP   | 1.00    | 0.80  | 0.14 | 0.87 | 0.87     | 0.69  | 0.08 | 0.74 |
|          | WRead |         | 1.00  | 0.18 | 0.58 | 0.80     | 0.83  | 0.12 | 0.67 |
|          | VP    |         |       | 1.00 | 0.12 | -0.06    | -0.05 | 0.56 | 0.04 |
|          | PA    |         |       |      | 1.00 | 0.78     | 0.56  | 0.11 | 0.74 |
| Posttest | RSP   |         |       |      |      | 1.00     | 0.74  | 0.06 | 0.87 |
|          | WRead |         |       |      |      |          | 1.00  | 0.04 | 0.47 |
|          | VP    |         |       |      |      |          |       | 1.00 | 0.17 |
|          | PA    |         |       |      |      |          |       |      | 1.00 |

*Means and Standard Deviations for Kindergarten Scores, Overall and by Group*

| Outcome | Group     | Test Period | Mean  | SD    | N   | Min | Max  |
|---------|-----------|-------------|-------|-------|-----|-----|------|
| RSP     | Treatment | Pre         | 47.5  | 27.3  | 78  | 1   | 99   |
|         |           | Post        | 49.9  | 26.1  | 62  | 1   | 99   |
|         | Control   | Pre         | 39.8  | 26.7  | 117 | 1   | 99   |
|         |           | Post        | -     | -     | -   | -   | -    |
|         | Overall   | Pre         | 43.0  | 27.2  | 195 | 1   | 99   |
|         |           | Post        | 49.9  | 26.1  | 62  | 1   | 99   |
| WRead   | Treatment | Pre         | 282.0 | 114.7 | 78  | 0   | 425  |
|         |           | Post        | 282.7 | 106.8 | 62  | 0   | 559  |
|         | Control   | Pre         | 260.8 | 135.0 | 117 | 0   | 1000 |
|         |           | Post        | -     | -     | -   | -   | -    |
|         | Overall   | Pre         | 269.7 | 127.0 | 195 | 0   | 1000 |
|         |           | Post        | 282.7 | 106.8 | 62  | 0   | 559  |
| VP      | Treatment | Pre         | 386.1 | 69.1  | 78  | 250 | 579  |
|         |           | Post        | 405.8 | 72.0  | 62  | 251 | 638  |
|         | Control   | Pre         | 378.9 | 69.1  | 117 | 218 | 638  |
|         |           | Post        | -     | -     | -   | -   | -    |
|         | Overall   | Pre         | 381.9 | 69.0  | 195 | 218 | 638  |
|         |           | Post        | 405.8 | 72.0  | 62  | 251 | 638  |
| PA      | Treatment | Pre         | 416.5 | 115.7 | 78  | 88  | 900  |
|         |           | Post        | 432.1 | 122.2 | 62  | 19  | 900  |
|         | Control   | Pre         | 381.8 | 122.8 | 117 | 0   | 900  |
|         |           | Post        | -     | -     | 121 | -   | -    |
|         | Overall   | Pre         | 396.3 | 120.8 | 195 | 0   | 900  |
|         |           | Post        | 432.1 | 122.2 | 62  | 19  | 900  |

*Notes.* RSP = Reading Success Probability; WRead = Word Reading; VP = Vocabulary Pairs; PA = Phonemic Awareness.

**Tables S4 (Grade 1)***Correlations for First-Grade Scores*

|          |       | Pretest |       |      |      | Posttest |       |      |      |
|----------|-------|---------|-------|------|------|----------|-------|------|------|
|          |       | RSP     | WRead | VP   | FD   | RSP      | WRead | VP   | FD   |
| Pretest  | RSP   | 1.00    | 0.69  | 0.63 | 0.30 | 0.54     | 0.42  | 0.39 | 0.27 |
|          | WRead |         | 1.00  | 0.29 | 0.26 | 0.42     | 0.59  | 0.28 | 0.19 |
|          | VP    |         |       | 1.00 | 0.27 | 0.38     | 0.25  | 0.41 | 0.26 |
|          | FD    |         |       |      | 1.00 | 0.18     | 0.14  | 0.24 | 0.60 |
| Posttest | RSP   |         |       |      |      | 1.00     | 0.72  | 0.62 | 0.28 |
|          | WRead |         |       |      |      |          | 1.00  | 0.22 | 0.25 |
|          | VP    |         |       |      |      |          |       | 1.00 | 0.21 |
|          | FD    |         |       |      |      |          |       |      | 1.00 |

*Means and Standard Deviations for First-Grade Scores, Overall and by Group*

| Outcome | Group     | Test Period | Mean  | SD    | N   | Min | Max  |
|---------|-----------|-------------|-------|-------|-----|-----|------|
| RSP     | Treatment | Pre         | 31.4  | 28.7  | 98  | 1   | 95   |
|         |           | Post        | 40.7  | 30.2  | 78  | 1   | 96   |
|         | Control   | Pre         | 27.1  | 25.2  | 116 | 1   | 96   |
|         |           | Post        | 24.9  | 26.8  | 106 | 1   | 99   |
|         | Overall   | Pre         | 28.7  | 26.6  | 214 | 1   | 96   |
|         |           | Post        | 31.2  | 29.2  | 184 | 1   | 99   |
| WRead   | Treatment | Pre         | 446.4 | 92.1  | 98  | 115 | 576  |
|         |           | Post        | 475.1 | 75.7  | 78  | 204 | 584  |
|         | Control   | Pre         | 426.0 | 115.7 | 116 | 0   | 576  |
|         |           | Post        | 404.1 | 150.1 | 106 | 0   | 1000 |
|         | Overall   | Pre         | 433.7 | 107.6 | 214 | 0   | 576  |
|         |           | Post        | 432.6 | 130.2 | 184 | 0   | 1000 |
| VP      | Treatment | Pre         | 453.1 | 98.4  | 98  | 205 | 704  |
|         |           | Post        | 470.7 | 94.4  | 78  | 199 | 798  |
|         | Control   | Pre         | 461.2 | 81.0  | 116 | 220 | 670  |
|         |           | Post        | 460.8 | 92.9  | 106 | 199 | 683  |
|         | Overall   | Pre         | 458.1 | 87.8  | 214 | 205 | 704  |
|         |           | Post        | 464.8 | 93.4  | 184 | 199 | 798  |
| FD      | Treatment | Pre         | 459.5 | 98.8  | 98  | 131 | 721  |
|         |           | Post        | 488.6 | 99.7  | 78  | 63  | 718  |
|         | Control   | Pre         | 437.3 | 116.8 | 116 | 40  | 722  |
|         |           | Post        | 470.5 | 115.9 | 106 | 0   | 1000 |
|         | Overall   | Pre         | 445.7 | 110.7 | 214 | 40  | 722  |
|         |           | Post        | 477.8 | 109.8 | 184 | 0   | 1000 |

*Notes.* RSP = Reading Success Probability; WRead = Word Reading; VP = Vocabulary Pairs; FD = Following Directions.



**Tables S5 (Grade 2)***Correlations for Second-Grade Scores*

|          |       | Pretest |       |      |      |      | Posttest |       |      |      |      |
|----------|-------|---------|-------|------|------|------|----------|-------|------|------|------|
|          |       | RSP     | WRead | VP   | FD   | SP   | RSP      | WRead | VP   | FD   | SP   |
| Pretest  | RSP   | 1.00    | 0.50  | 0.48 | 0.61 | 0.80 | 0.75     | 0.41  | 0.37 | 0.38 | 0.66 |
|          | WRead |         | 1.00  | 0.27 | 0.27 | 0.55 | 0.48     | 0.45  | 0.29 | 0.24 | 0.47 |
|          | VP    |         |       | 1.00 | 0.39 | 0.20 | 0.42     | 0.21  | 0.58 | 0.35 | 0.25 |
|          | FD    |         |       |      | 1.00 | 0.29 | 0.45     | 0.22  | 0.35 | 0.51 | 0.31 |
|          | SP    |         |       |      |      | 1.00 | 0.64     | 0.56  | 0.17 | 0.26 | 0.76 |
| Posttest | RSP   |         |       |      |      |      | 1.00     | 0.46  | 0.48 | 0.62 | 0.82 |
|          | WRead |         |       |      |      |      |          | 1.00  | 0.20 | 0.22 | 0.55 |
|          | VP    |         |       |      |      |      |          |       | 1.00 | 0.30 | 0.22 |
|          | FD    |         |       |      |      |      |          |       |      | 1.00 | 0.34 |
|          | SP    |         |       |      |      |      |          |       |      |      | 1.00 |

*Means and Standard Deviations for Second-Grade Scores, Overall and by Group*

| Outcome | Group     | Test Period | Mean  | SD    | N   | Min | Max  |
|---------|-----------|-------------|-------|-------|-----|-----|------|
| RSP     | Treatment | Pre         | 39.1  | 27.9  | 116 | 1   | 94   |
|         |           | Post        | 44.7  | 28.6  | 91  | 1   | 98   |
|         | Control   | Pre         | 34.4  | 28.0  | 175 | 1   | 98   |
|         |           | Post        | 37.0  | 28.7  | 163 | 1   | 98   |
|         | Overall   | Pre         | 36.0  | 28.0  | 291 | 1   | 98   |
|         |           | Post        | 39.7  | 28.8  | 254 | 1   | 98   |
| WRead   | Treatment | Pre         | 524.3 | 77.2  | 116 | 115 | 722  |
|         |           | Post        | 558.6 | 78.5  | 91  | 382 | 1000 |
|         | Control   | Pre         | 519.4 | 89.0  | 175 | 0   | 706  |
|         |           | Post        | 541.8 | 106.1 | 163 | 115 | 1000 |
|         | Overall   | Pre         | 521.0 | 85.2  | 291 | 0   | 722  |
|         |           | Post        | 547.6 | 97.6  | 254 | 115 | 1000 |
| VP      | Treatment | Pre         | 538.9 | 69.4  | 116 | 356 | 747  |
|         |           | Post        | 562.7 | 70.7  | 91  | 436 | 740  |
|         | Control   | Pre         | 529.9 | 91.1  | 175 | 266 | 767  |
|         |           | Post        | 560.8 | 98.8  | 163 | 342 | 1000 |
|         | Overall   | Pre         | 532.9 | 84.6  | 291 | 266 | 767  |
|         |           | Post        | 561.4 | 89.9  | 254 | 342 | 1000 |
| FD      | Treatment | Pre         | 546.5 | 136.7 | 116 | 245 | 1000 |
|         |           | Post        | 593.3 | 115.8 | 91  | 170 | 806  |
|         | Control   | Pre         | 525.5 | 140.7 | 175 | 0   | 1000 |
|         |           | Post        | 562.2 | 129.6 | 163 | 56  | 1000 |
|         | Overall   | Pre         | 532.4 | 139.5 | 291 | 0   | 1000 |
|         |           | Post        | 573.0 | 125.7 | 254 | 56  | 1000 |

| Outcome | Group     | Test Period | Mean  | SD    | N   | Min | Max |
|---------|-----------|-------------|-------|-------|-----|-----|-----|
| SP      | Treatment | Pre         | 564.7 | 105.3 | 93  | 276 | 789 |
|         |           | Post        | 563.7 | 102.1 | 95  | 343 | 778 |
|         | Control   | Pre         | 537.1 | 126.5 | 190 | 100 | 789 |
|         |           | Post        | 522.3 | 134.1 | 179 | 100 | 789 |
|         | Overall   | Pre         | 546.2 | 120.5 | 283 | 100 | 789 |
|         |           | Post        | 536.6 | 125.3 | 274 | 100 | 789 |

*Notes.* RSP = Reading Success Probability; WRec = Word Reading; VP = Vocabulary Pairs; FD = Following Directions; SP = Spelling.

### Tables S6 (Grade 3)

#### *Correlations for Third-Grade Scores*

|          |      | Pretest |      |      |      |      | Posttest |      |      |      |      |
|----------|------|---------|------|------|------|------|----------|------|------|------|------|
|          |      | RSP     | WRec | VK   | SK   | RC   | RSP      | WRec | VK   | SK   | RC   |
| Pretest  | RSP  | 1.00    | 0.65 | 0.42 | 0.41 | 0.85 | 0.60     | 0.39 | 0.41 | 0.36 | 0.56 |
|          | WRec |         | 1.00 | 0.20 | 0.22 | 0.44 | 0.43     | 0.39 | 0.24 | 0.18 | 0.38 |
|          | VK   |         |      | 1.00 | 0.19 | 0.32 | 0.26     | 0.14 | 0.38 | 0.08 | 0.24 |
|          | SK   |         |      |      | 1.00 | 0.39 | 0.36     | 0.24 | 0.20 | 0.32 | 0.33 |
|          | RC   |         |      |      |      | 1.00 | 0.51     | 0.30 | 0.33 | 0.35 | 0.52 |
| Posttest | RSP  |         |      |      |      |      | 1.00     | 0.63 | 0.42 | 0.40 | 0.85 |
|          | WRec |         |      |      |      |      |          | 1.00 | 0.26 | 0.24 | 0.40 |
|          | VK   |         |      |      |      |      |          |      | 1.00 | 0.30 | 0.34 |
|          | SK   |         |      |      |      |      |          |      |      | 1.00 | 0.36 |
|          | RC   |         |      |      |      |      |          |      |      |      | 1.00 |

#### *Means and Standard Deviations for Third-Grade Scores, Overall and by Group*

| Outcome | Group     | Test Period | Mean  | SD    | N   | Min | Max  |
|---------|-----------|-------------|-------|-------|-----|-----|------|
| RSP     | Treatment | Pre         | 22.4  | 26.1  | 118 | 1   | 99   |
|         |           | Post        | 22.6  | 26.1  | 92  | 1   | 98   |
|         | Control   | Pre         | 26.8  | 29.5  | 210 | 1   | 99   |
|         |           | Post        | 27.3  | 29.4  | 194 | 1   | 99   |
|         | Overall   | Pre         | 25.5  | 28.6  | 328 | 1   | 99   |
|         |           | Post        | 25.9  | 28.5  | 286 | 1   | 99   |
| WRec    | Treatment | Pre         | 296.5 | 145.3 | 118 | 0   | 872  |
|         |           | Post        | 280.6 | 114.1 | 92  | 0   | 601  |
|         | Control   | Pre         | 308.1 | 131.8 | 210 | 0   | 1000 |
|         |           | Post        | 326.6 | 129.1 | 194 | 0   | 906  |
|         | Overall   | Pre         | 304.8 | 135.7 | 328 | 0   | 1000 |
|         |           | Post        | 312.9 | 126.4 | 286 | 0   | 906  |

*Notes.* RSP = Reading Success Probability; WRec = Word Recognition; VK = Vocabulary Knowledge; SK = Syntactic Knowledge; RC = Reading Comprehension. There were a small number of students in each group who were missing pre- and/or posttest scores.

### Correlations for Fourth-Grade Scores

[illegible]

*Means and Standard Deviations for Fourth-Grade Scores, Overall and by Group*

| Outcome | Group     | Test Period | Mean  | SD    | N   | Min | Max  |
|---------|-----------|-------------|-------|-------|-----|-----|------|
| RSP     | Treatment | Pre         | 13.2  | 21.9  | 72  | 1   | 99   |
|         |           | Post        | 24.8  | 32.9  | 53  | 1   | 99   |
|         | Control   | Pre         | 13.7  | 23.3  | 205 | 1   | 99   |
|         |           | Post        | 15.7  | 25.6  | 202 | 1   | 99   |
|         | Overall   | Pre         | 13.6  | 23.0  | 277 | 1   | 99   |
|         |           | Post        | 17.6  | 27.4  | 255 | 1   | 99   |
| WRec    | Treatment | Pre         | 384.2 | 100.0 | 72  | 124 | 600  |
|         |           | Post        | 380.3 | 100.1 | 53  | 135 | 895  |
|         | Control   | Pre         | 380.7 | 107.1 | 205 | 0   | 880  |
|         |           | Post        | 374.1 | 113.1 | 202 | 0   | 1000 |
|         | Overall   | Pre         | 381.4 | 105.6 | 277 | 0   | 880  |
|         |           | Post        | 375.4 | 110.4 | 255 | 0   | 1000 |
| VK      | Treatment | Pre         | 388.7 | 86.6  | 72  | 150 | 579  |
|         |           | Post        | 400.8 | 80.7  | 53  | 177 | 590  |
|         | Control   | Pre         | 379.7 | 94.8  | 205 | 0   | 696  |
|         |           | Post        | 384.0 | 108.3 | 202 | 0   | 723  |
|         | Overall   | Pre         | 381.5 | 93.1  | 277 | 0   | 696  |
|         |           | Post        | 387.5 | 103.3 | 255 | 0   | 723  |
| SK      | Treatment | Pre         | 410.1 | 94.6  | 72  | 112 | 581  |
|         |           | Post        | 437.8 | 104.0 | 53  | 195 | 700  |
|         | Control   | Pre         | 392.5 | 117.2 | 205 | 0   | 713  |
|         |           | Post        | 405.7 | 113.5 | 202 | 0   | 713  |
|         | Overall   | Pre         | 396.1 | 113.0 | 277 | 0   | 713  |
|         |           | Post        | 412.4 | 112.2 | 255 | 0   | 713  |
| RC      | Treatment | Pre         | 362.7 | 63.6  | 72  | 252 | 559  |
|         |           | Post        | 382.5 | 79.0  | 53  | 260 | 580  |
|         | Control   | Pre         | 354.8 | 61.4  | 205 | 242 | 569  |
|         |           | Post        | 357.0 | 70.5  | 202 | 214 | 693  |
|         | Overall   | Pre         | 356.4 | 61.8  | 277 | 242 | 569  |
|         |           | Post        | 362.4 | 73.0  | 255 | 214 | 693  |

*Notes.* RSP = Reading Success Probability; WRec = Word Recognition; VK = Vocabulary Knowledge; SK = Syntactic Knowledge; RC = Reading Comprehension.

## References

- Becker, B.J. (1988). Synthesizing standardized mean-change measures. *British Journal of Mathematical and Statistical Psychology*, 41, 257-278. doi: 10.1111/j.2044-8317.1988.tb00901.x
- Hox, J.J. (2010). *Multilevel analysis: Techniques and applications* (2nd ed.). New York, NY: Routledge.
- Raudenbush, S.W., & Bryk, A.S. (2002). *Hierarchical linear models: Applications and data analysis methods* (2nd ed.). Thousand Oaks, CA: Sage.
- Singer, J.D., & Willett, J.B. (2003). *Applied longitudinal data analysis: Modeling change and event occurrence*. New York: Oxford University Press.
